# Supplementary material for: A switchable reagent ion high resolution time-of-flight chemical ionization mass spectrometer for real-time measurement of gas phase oxidized species: characterization from the 2013 southern oxidant and aerosol study
Source: Copernicus journal article supplement (doi:10.5194/amt-8-2945-2015), 2015-07-22
Supplement: Supplementary file 1 [file amt-8-2945-2015-supplement.pdf]

Supplement of Atmos. Meas. Tech., 8, 2945–2959, 2015  
<http://www.atmos-meas-tech.net/8/2945/2015/>  
doi:10.5194/amt-8-2945-2015-supplement  
© Author(s) 2015. CC Attribution 3.0 License.

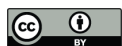

*Supplement of*

**A switchable reagent ion high resolution time-of-flight chemical ionization mass spectrometer for real-time measurement of gas phase oxidized species: characterization from the 2013 southern oxidant and aerosol study**

**P. Brophy and D. K. Farmer**

*Correspondence to:* D. K. Farmer ([delphine.farmer@colostate.edu](mailto:delphine.farmer@colostate.edu))

The copyright of individual parts of the supplement might differ from the CC-BY 3.0 licence.

27

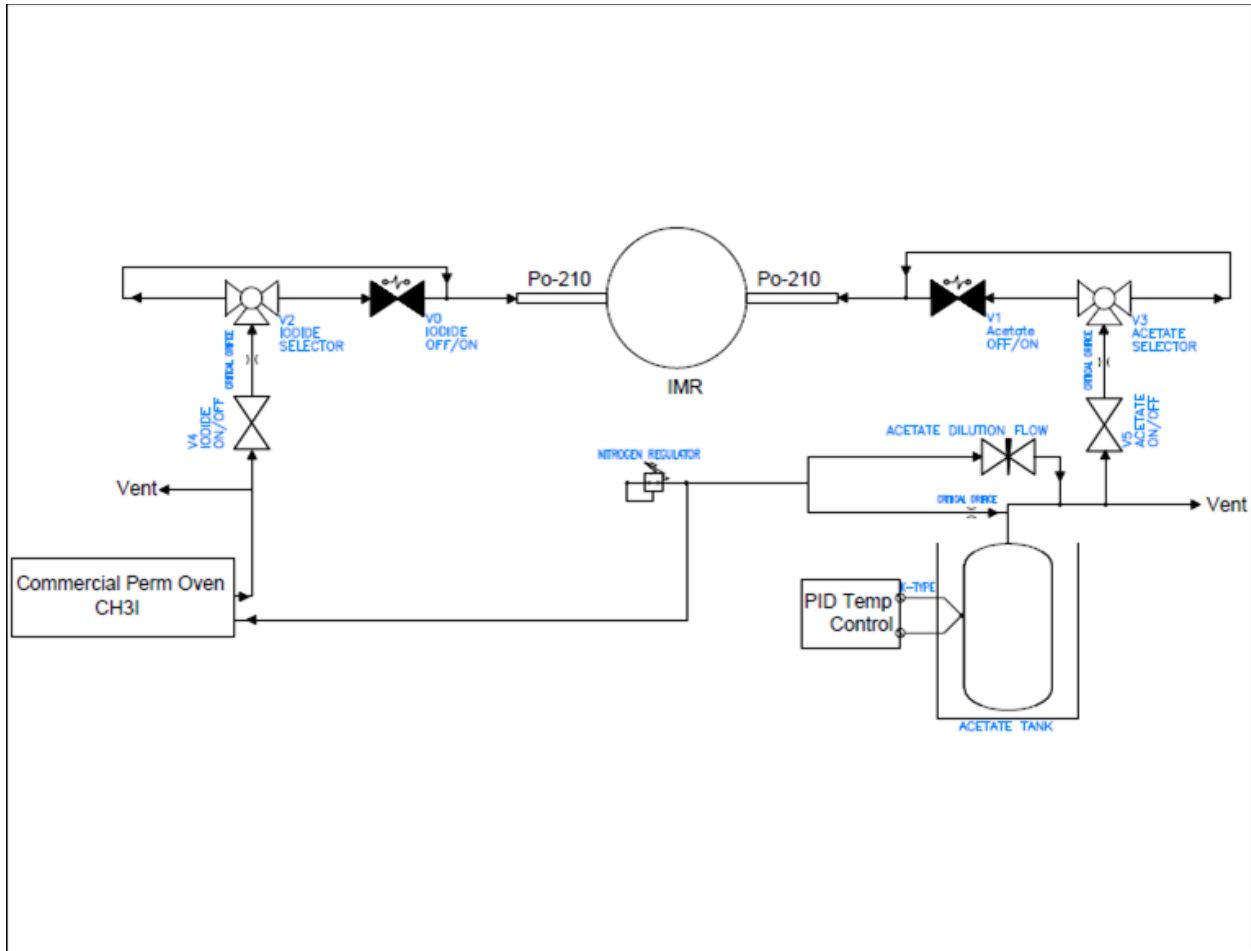

28

29 SI 1: Schematic diagram showing the setup for reagent switching with selectable flow path for  
30 automatic switching driven by solenoid valves or manual control.

31

32

33

34

35

36

37

38

39

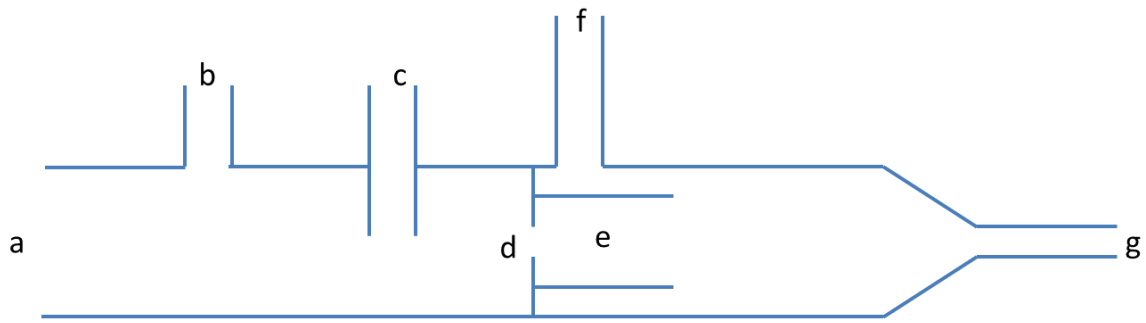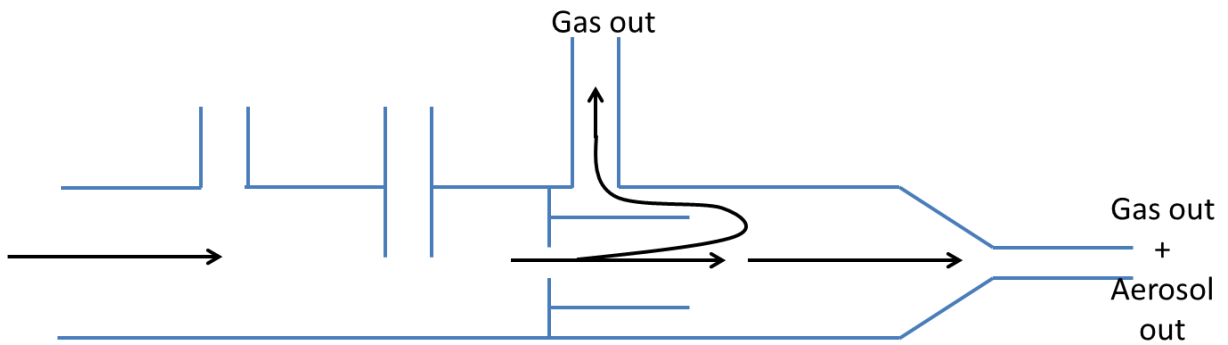

40

41 SI 2: Glass inlet design (a) aerosol and gas inlet; (b) zero air overflow port; (c) calibration port  
42 (not used in this study); (d) critical orifice; (e) glass particle skimmer and flow director; (f) gas  
43 sampling port at reduced pressure; (g) bypass line at reduced pressure

44

45

46

47

48

49

50

51

52

53

54

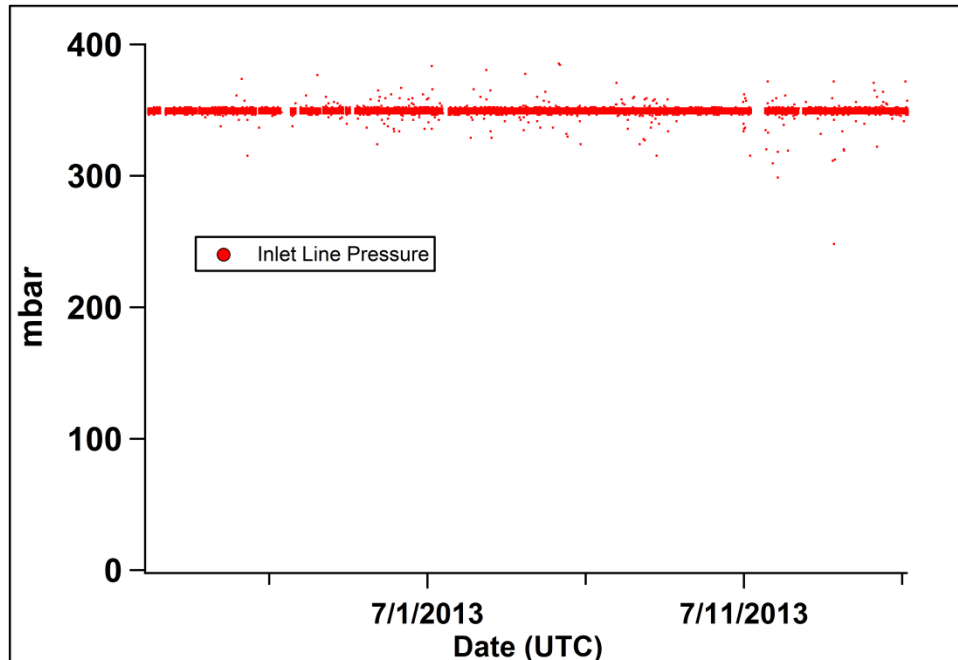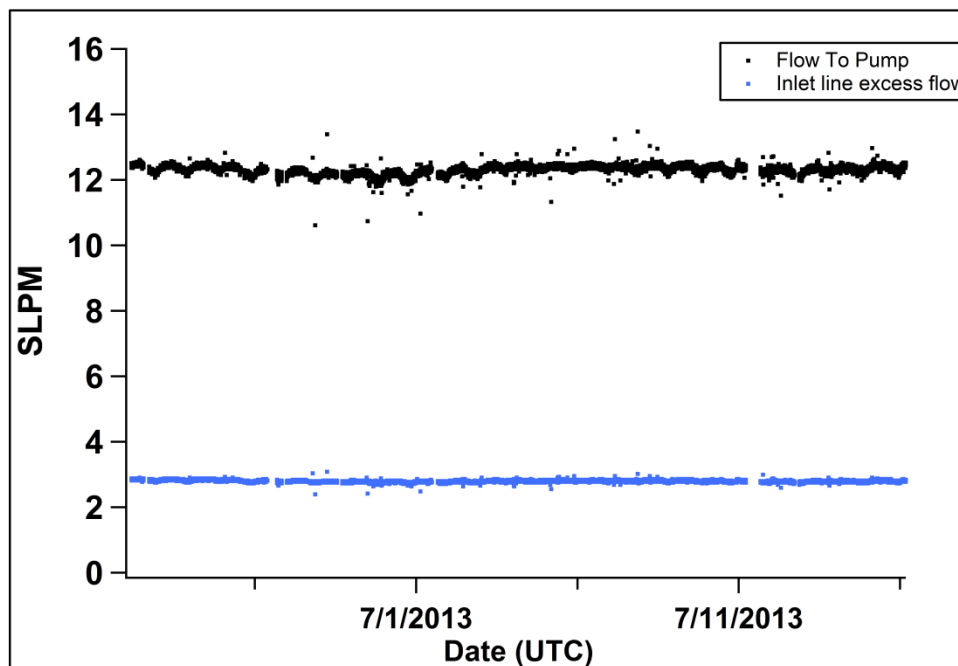

56

57 SI 3: Diagnostic inlet performance showing the pressure stability, the total flow through the gas  
58 sampling line, and the total flow to the pump during SOAS.

59

60

61

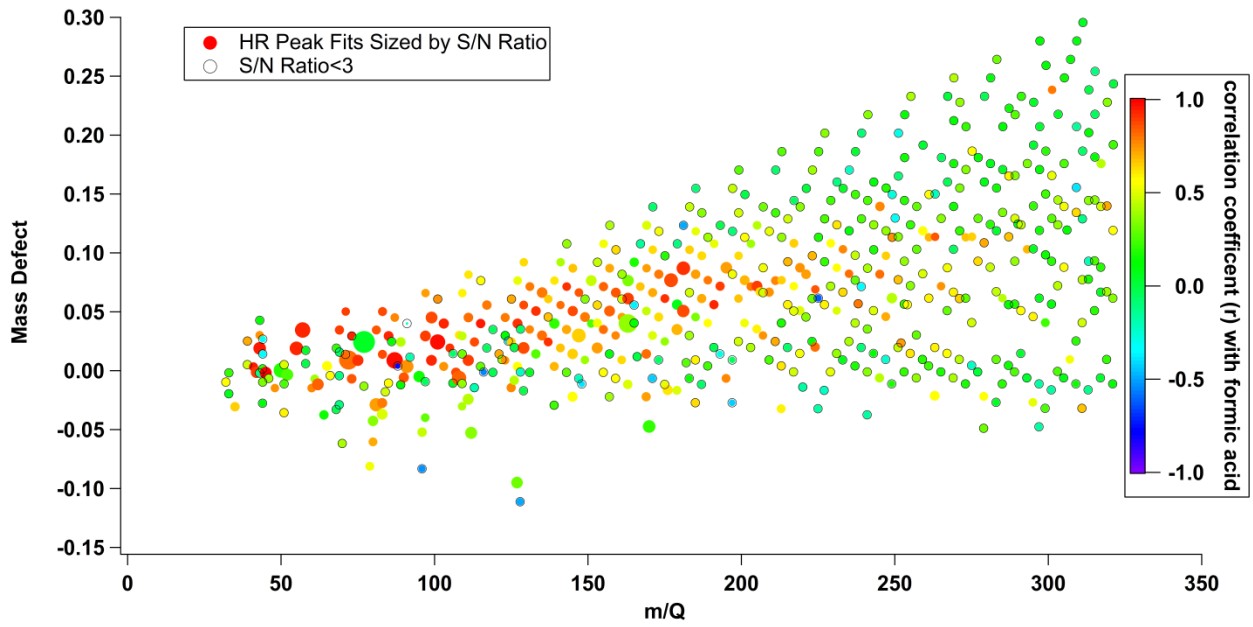

62

63 SI 4: Mass defect plot showing all HR ion fits. Each ion fit is colored by the correlation  
64 coefficient with formic acid and sized by S/N ratio. Ions with a S/N < 3 are marked with a black  
65 circle outline.

66

67

68

69

70

71

72

73

74

75

76

77

78

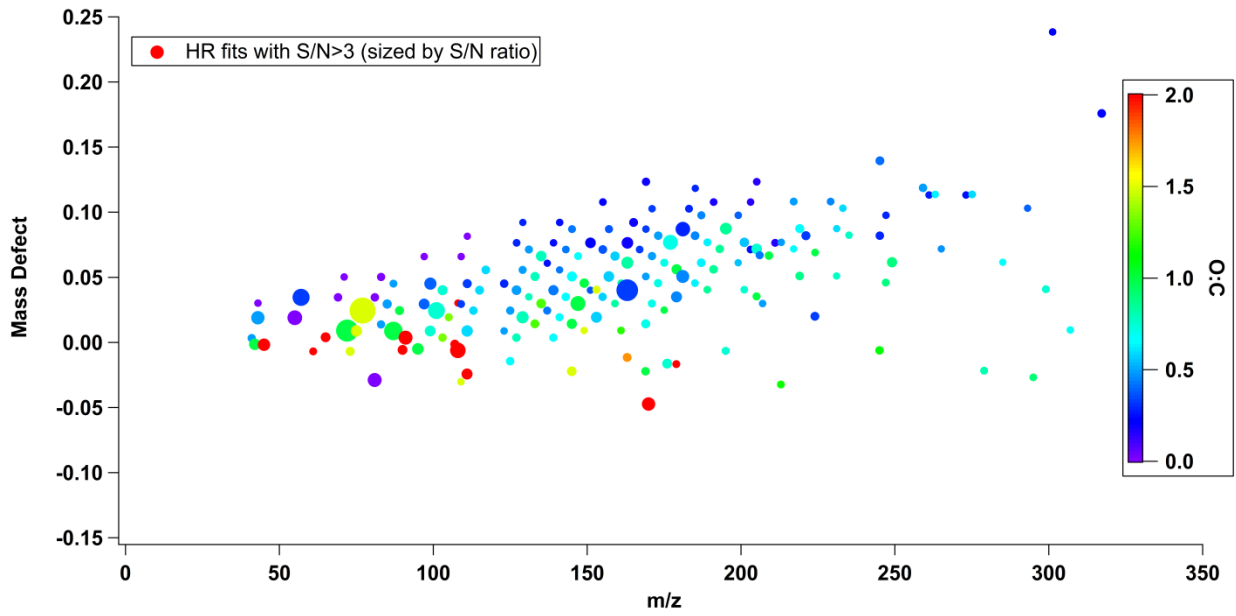

79

80 SI 5: Mass defect enhancement plot showing all species with S/N>3 and colored by  
81 oxygen:carbon ratio as determined from the HR ion fits.

82

83

84

85

86

87

88

89
